# Supplementary material for: Mandibular trabecular bone pattern before and two years after medical or surgical obesity treatment in young Swedish women
Source: PubMed Central journal article supplement (PMC11725539; doi:10.1007/s00784-024-06142-y), 2025-01-12
Supplement: 784_2024_6142_MOESM1_ESM.pdf [file 784_2024_6142_MOESM1_ESM.pdf]

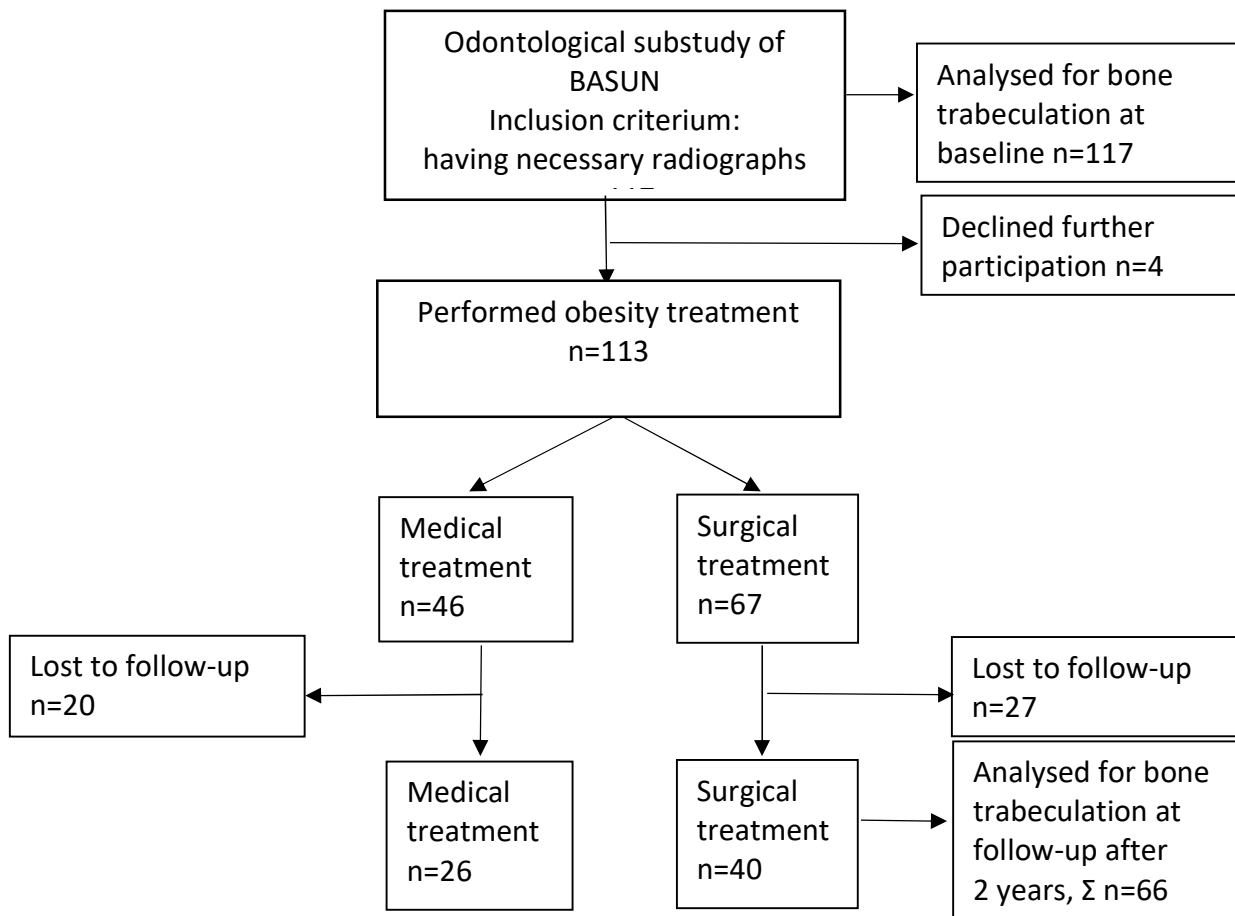

BASUN: BAriatric surgery SUbstitution and Nutrition study

Modified from a figure earlier published:

Taghat N, Mossberg K, Lingström P, Petzold M, Östberg AL. Impact of Medical and Surgical Obesity Treatment on Dental Caries: A 2-Year Prospective Cohort Study. *Caries Res.* 2023;57(3):231-242. doi: 10.1159/000533609. Epub 2023 Aug 16. PMID: 37586350.

### Figure S1.

Article title: Mandibular trabecular bone pattern before and two years after medical or surgical obesity treatment in young Swedish women

Authors: Östberg AL, Wallenius V, Taghat N, Jonasson G.

Affiliation and e-mail of the corresponding author: Department of Behavioural and Community Dentistry, Institute of Odontology, Sahlgrenska Academy, University of Gothenburg, Gothenburg, Sweden; anna-lena.ostberg@odontologi.gu.se
